# Supplementary material for: Polymorphism of VRTN Gene g.20311_20312ins291 Was Associated with the Number of Ribs, Carcass Diagonal Length and Cannon Bone Circumference in Suhuai Pigs
Source: MDPI journal article supplement (doi:10.3390/ani10030484), 2020-03-13
Supplement: s1 [file s1]

## Supplementary

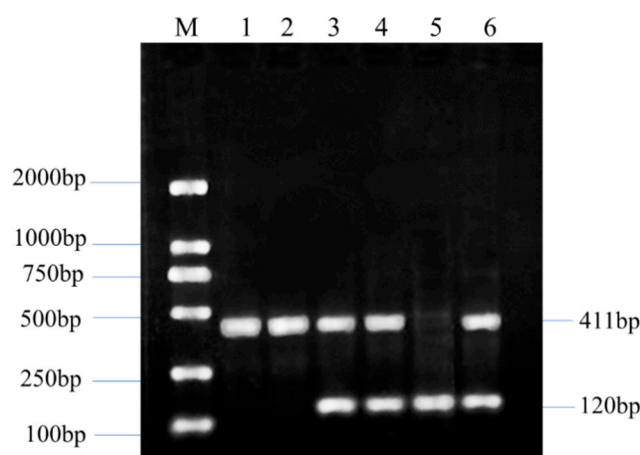

**Supplementary Figure 1.** Genotyping for the *VRTN* gene G.20311\_20312ins291 mutations. Lanes 1 to 6 showed PCR products. M: 2000bp DNA Marker; 1 and 2: ins/ins genotype; 3,4 and 6: ins/del genotype; 5: del/del genotype.

**Table S1.** Correlation analysis between batch/sex/age and RIB/carcass traits of Suhuai fattening pigs.

| Traits | $p_{\text{batch}}$ | $p_{\text{sex}}$ | $p_{\text{age}}$ |
|--------|--------------------|------------------|------------------|
| RIB    | 0.3341             | 0.4585           | 0.4030           |
| CSL    | 0.0046             | 0.0493           | 0.0030           |
| CDL    | 0.0000             | 0.0034           | 0.0014           |
| CWT    | 0.0000             | 0.0000           | 0.0012           |

Note: RIB, number of ribs; CSL, carcass straight length; CDL, carcass diagonal length; CWT, carcass weight;  $p_{\text{batch}}$ ,  $p_{\text{sex}}$  and  $p_{\text{age}}$  represent the  $p$ -value of the correlation between RIB/carcass traits and batch/sex/age of Suhuai fattening pigs, respectively.

**Table S2.** Correlation analysis between batch/sex/age and body size traits of Suhuai gilts.

| Traits | $p_{\text{batch}}$ | $p_{\text{sex}}$ | $p_{\text{age}}$ |
|--------|--------------------|------------------|------------------|
| CC     | 0.0000             | 0.0000           | 0.7942           |
| AC     | 0.0000             | 0.0029           | 0.5820           |
| CBC    | 0.0000             | 0.0000           | 0.5415           |
| RC     | 0.0000             | 0.0000           | 0.1380           |
| BL     | 0.0000             | 0.0000           | 0.9559           |
| BW     | 0.0000             | 0.0018           | 0.3504           |

Note: CC, chest circumference; AC, abdominal circumference; CBC, cannon bone circumference; RC, rump circumference; BL, body length; BW, body weight;  $p_{\text{batch}}$ ,  $p_{\text{sex}}$  and  $p_{\text{age}}$  represent the  $p$ -value of the correlation between body size traits and batch/sex/age of Suhuai gilts, respectively.
